# Supplementary material for: Patterns and drivers of organic matter decomposition in peatland open-water pools
Source: Copernicus journal article supplement (doi:10.5194/bg-21-3491-2024), 2024-08-02

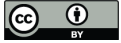

*Supplement of*

## **Patterns and drivers of organic matter decomposition in peatland open-water pools**

**Julien Arsenault et al.**

*Correspondence to:* Julien Arsenault ([julien.arsenault.1@umontreal.ca](mailto:julien.arsenault.1@umontreal.ca))

The copyright of individual parts of the supplement might differ from the article licence.

**Table S1.** Results of the two-way analysis of variance of decay  $k$  values, regardless of the litter type, with interacting effects between pool and depth of incubation, and of the Tukey HSD posthoc test performed to differentiate depths of incubation. Asterisks show relationships with  $p$ -values ( $P$ ) < 0.05. Depths with different level letters are statistically different at a significance level of 5% ( $P$  < 0.05).

| Factor     | df | Sum of squares | Mean square | F     | $P$    | Depths            | $P$    |
|------------|----|----------------|-------------|-------|--------|-------------------|--------|
| Depth      | 2  | 0.020          | 0.010       | 8.936 | 0.002* | Surface-Bottom    | 0.002* |
| Pool       | 5  | 0.005          | 0.001       | 0.864 | 0.524  | Surface-Sediments | 0.020* |
| Depth:Pool | 10 | 0.004          | 0.000       | 0.320 | 0.965  | Bottom-Sediments  | 0.544  |
| Residuals  | 18 | 0.020          | 0.001       |       |        |                   |        |
|            |    |                |             |       |        |                   |        |
|            |    |                |             |       |        | Depth             | Level  |
|            |    |                |             |       |        | Surface           | A      |
|            |    |                |             |       |        | Bottom            | B      |
|            |    |                |             |       |        | Sediments         | B      |

**Table S2.** Results of the analysis of variance and of the Tukey HSD posthoc test of *Typha latifolia* decay  $k$  values in relation to depth of incubation. Asterisks show relationships with  $p$ -values ( $P$ ) < 0.05. Depths with different level letters are statistically different at a significance level of 5% ( $P$  < 0.05).

| Factor    | df | Sum of squares | Mean square | F     | $P$     | Depths            | $P$    |
|-----------|----|----------------|-------------|-------|---------|-------------------|--------|
| Depth     | 2  | 0.317          | 0.106       | 78.28 | <0.001* | Surface-Bottom    | 0.011* |
| Residuals | 16 | 0.022          | 0.001       |       |         | Surface-Sediments | 0.005* |
|           |    |                |             |       |         | Bottom-Sediments  | 0.979  |
|           |    |                |             |       |         |                   |        |
|           |    |                |             |       |         |                   |        |
|           |    |                |             |       |         | Depth             | Level  |
|           |    |                |             |       |         | Surface           | A      |
|           |    |                |             |       |         | Bottom            | B      |
|           |    |                |             |       |         | Sediments         | B      |



**Table S5.** Results of the generalized linear models (GLMs) with gamma distribution of the decay  $k$  values in relation to depth of incubation and final litter chemistry for both *Typha latifolia* and *Sphagnum capillifolium* after 27 months of incubation in the pools of the Grande plée Bleue peatland. Asterisks show relationships with  $p$ -values ( $P$ ) < 0.05.

| Coefficients          | <i>Typha latifolia</i> |            |        |         | <i>Sphagnum capillifolium</i> |            |        |         |
|-----------------------|------------------------|------------|--------|---------|-------------------------------|------------|--------|---------|
|                       | Estimate               | Std. error | t      | $P$     | Estimate                      | Std. error | t      | $P$     |
| (Intercept)           | 0.127                  | 0.125      | 10.169 | <0.001* | 0.079                         | 0.008      | 9.522  | <0.001* |
| Depth                 | -0.001                 | 0.001      | -4.722 | <0.001* | -0.001                        | 0.001      | -1.987 | 0.064   |
| (Intercept)           | 0.216                  | 0.026      | 8.251  | <0.001* | 0.110                         | 0.030      | 3.683  | 0.002*  |
| C:N                   | -0.002                 | 0.001      | -5.623 | <0.001* | -0.001                        | 0.001      | -1.480 | 0.158   |
| (Intercept)           | 0.174                  | 0.041      | 4.231  | <0.001* | -0.107                        | -0.030     | 3.557  | 0.003*  |
| C:P                   | -0.001                 | -0.001     | -2.218 | 0.041*  | -0.001                        | 0.001      | -1.354 | 0.195   |
| (Intercept)           | -0.016                 | 0.034      | -0.474 | 0.642   | 0.064                         | 0.043      | 1.494  | 0.155   |
| N:P                   | 0.003                  | 0.001      | 2.928  | 0.001*  | 0.001                         | 0.001      | 0.080  | 0.938   |
| (Intercept)           | -2.396                 | 1.071      | -2.237 | 0.040*  | 0.414                         | 0.629      | 0.659  | 0.519   |
| $\delta^{13}\text{C}$ | -0.093                 | 0.040      | -2.316 | 0.034*  | 0.012                         | 0.023      | 0.552  | 0.589   |
| (Intercept)           | 0.107                  | 0.013      | 8.422  | <0.001* | 0.107                         | 0.034      | 3.176  | 0.006*  |
| $\delta^{15}\text{N}$ | 0.013                  | 0.006      | 2.239  | 0.040*  | 0.005                         | 0.004      | 1.196  | 0.249   |
| (Intercept)           | -0.225                 | 0.224      | -1.006 | 0.329   | 0.155                         | 0.130      | 1.188  | 0.252   |
| 1420:1090             | 0.589                  | 0.419      | 1.407  | 0.179   | -0.203                        | 0.303      | -0.670 | 0.513   |
| (Intercept)           | -0.217                 | 0.095      | -2.290 | 0.036*  | 0.026                         | 0.087      | 0.304  | 0.765   |
| 1510:1090             | 0.725                  | 0.231      | 3.141  | 0.006*  | 0.168                         | 0.352      | 0.476  | 0.640   |
| (Intercept)           | -0.232                 | 0.092      | -2.518 | 0.023*  | 0.063                         | 0.093      | 0.681  | 0.506   |
| 1630:1090             | 0.529                  | 0.156      | 3.389  | 0.003*  | 0.009                         | 0.178      | 0.049  | 0.962   |
| (Intercept)           | -0.202                 | 0.206      | -0.979 | 0.342   | 0.191                         | 0.126      | 1.524  | 0.147   |
| 1720:1090             | 0.525                  | 0.372      | 1.413  | 0.177   | -0.262                        | 0.264      | -0.990 | 0.337   |

**Table S6.** Results of the generalized linear models (GLMs) with gamma distribution of the percentage of litter mass remaining at the surface (upper table) and the bottom (bottom table) of the pools with water chemistry measured at each retrieving time. Asterisks show relationships with p-values ( $P$ ) < 0.05

| <b>Pool surface</b> | <i>Typha latifolia</i> |          |            |        | <i>Sphagnum capillifolium</i> |          |            |        |
|---------------------|------------------------|----------|------------|--------|-------------------------------|----------|------------|--------|
|                     | Coefficients           | Estimate | Std. error | t      | $P$                           | Estimate | Std. error | t      |
| (Intercept)         | 0.931                  | 0.784    | 1.188      | 0.249  | 0.945                         | 0.550    | 1.719      | 0.101  |
| pH                  | -0.078                 | 0.150    | -0.520     | 0.609  | -0.067                        | 0.107    | -0.626     | 0.539  |
| DOC                 | 0.015                  | 0.020    | 0.763      | 0.454  | 0.013                         | 0.014    | 0.922      | 0.367  |
| TN                  | 0.035                  | 0.124    | 0.284      | 0.780  | 0.103                         | 0.091    | 1.132      | 0.271  |
| TP                  | 0.001                  | 0.001    | 0.337      | 0.740  | 0.001                         | 0.001    | 0.509      | 0.616  |
| NO <sub>3</sub>     | 0.001                  | 0.005    | 0.670      | 0.511  | -0.001                        | 0.004    | -0.082     | 0.936  |
| NH <sub>4</sub>     | -0.001                 | 0.001    | -0.474     | 0.641  | -0.001                        | 0.001    | -1.607     | 0.124  |
| PO <sub>4</sub>     | -0.013                 | 0.005    | -2.345     | 0.030* | -0.008                        | 0.004    | -2.131     | 0.045* |
| A <sub>254</sub>    | -0.421                 | 0.490    | -0.858     | 0.401  | -0.380                        | 0.352    | -1.079     | 0.293  |
| SUVA                | -0.061                 | 0.120    | 0.516      | 0.612  | 0.061                         | 0.087    | 0.708      | 0.487  |

| <b>Pool bottom</b> | <i>Typha latifolia</i> |          |            |        | <i>Sphagnum capillifolium</i> |          |            |       |
|--------------------|------------------------|----------|------------|--------|-------------------------------|----------|------------|-------|
|                    | Coefficients           | Estimate | Std. error | t      | $P$                           | Estimate | Std. error | t     |
| (Intercept)        | 0.921                  | 0.389    | 2.371      | 0.028* | 0.701                         | 0.405    | 1.733      | 0.098 |
| pH                 | -0.071                 | 0.075    | -0.945     | 0.356  | 0.032                         | 0.079    | 0.406      | 0.698 |
| DOC                | 0.015                  | 0.010    | 1.530      | 0.142  | 0.006                         | 0.010    | 0.614      | 0.546 |
| TN                 | 0.007                  | 0.063    | 0.104      | 0.918  | -0.090                        | 0.067    | -1.346     | 0.193 |
| TP                 | 0.001                  | 0.001    | 0.732      | 0.472  | 0.001                         | 0.001    | 0.600      | 0.555 |
| NO <sub>3</sub>    | 0.002                  | 0.003    | 0.630      | 0.536  | 0.003                         | 0.003    | 1.274      | 0.217 |
| NH <sub>4</sub>    | -0.001                 | 0.001    | -0.590     | 0.562  | 0.001                         | 0.001    | 0.620      | 0.542 |
| PO <sub>4</sub>    | -0.004                 | 0.003    | -1.547     | 0.138  | -0.002                        | 0.003    | -0.496     | 0.626 |
| A <sub>254</sub>   | -0.440                 | 0.239    | -1.842     | 0.080  | -0.158                        | 0.255    | -0.620     | 0.542 |
| SUVA               | -0.089                 | 0.059    | 1.503      | 0.149  | 0.034                         | 0.063    | 0.546      | 0.591 |

**Figure S1.** Changes in *Sphagnum capillifolium* (blue) and *Typha latifolia* (orange) chemistry after 27 months in relation to position of incubation in the pools (surface, at the bottom, and in the sediments, all pools together) and pool depth category (<1 m, ~1 m, and >1.5 m, regardless of depth of incubation). Boxes show the median and the 25th and 75th percentiles of the distributions, and whiskers show the 10th and 90th percentiles. Colored dots on the Y-axes of the graphs show the initial chemistry of the litter.

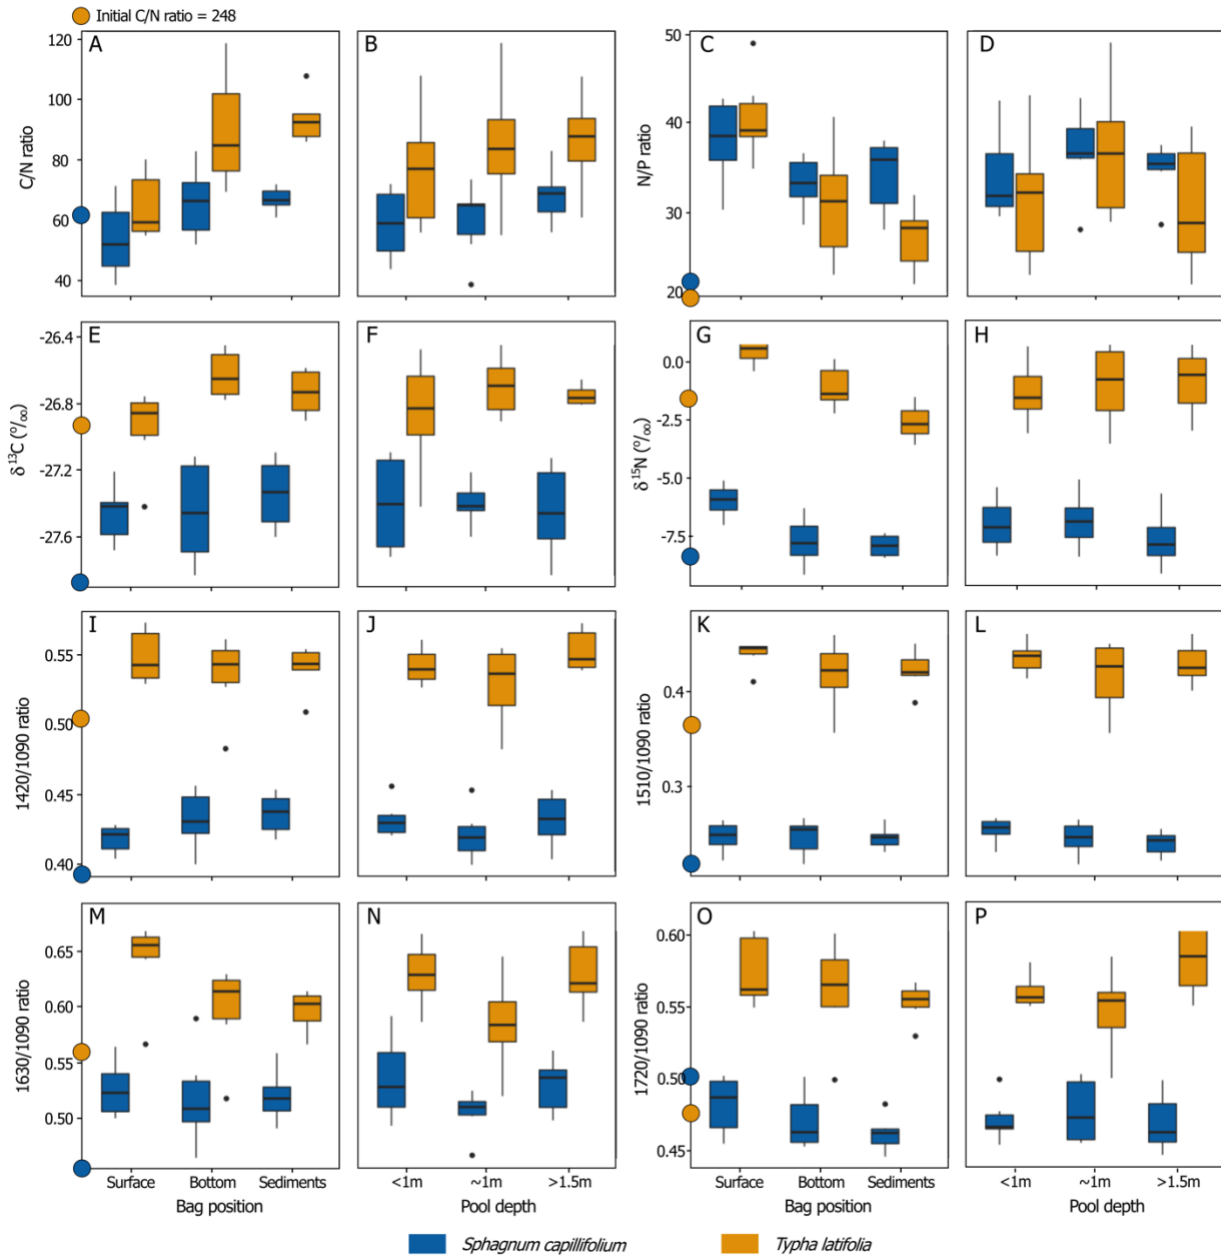

Supplement: Supplementary file 1 [file bg-21-3491-2024-supplement.pdf]
